# Supplementary material
Source: publisher figshare collection journal article supplement (https://sage.figshare.com/ndownloader/files/14909330)
Supplement: Supplementary file 1 [file 14909330]

## Appendix- the WIQ score

### 1.Distance subscale of the WIQ.

---

---

Please place a  $\surd$  in the box that best describes how hard it was for you to walk on level ground without stopping to rest for each of the following distances during the last week:

---

| During the last<br>week, how<br>difficult was it<br>for you to: | No<br>difficulty | Slight<br>difficulty | Some<br>difficulty | Much<br>difficulty | Unable<br>to do | Did not do<br>for other<br>reasons | Weight |
|-----------------------------------------------------------------|------------------|----------------------|--------------------|--------------------|-----------------|------------------------------------|--------|
|-----------------------------------------------------------------|------------------|----------------------|--------------------|--------------------|-----------------|------------------------------------|--------|

---

|                                      |                          |                          |                          |                          |                          |                          |     |
|--------------------------------------|--------------------------|--------------------------|--------------------------|--------------------------|--------------------------|--------------------------|-----|
| a. Walk 50<br>feet?                  | <input type="checkbox"/> | 50  |
|                                      | 4                        | 3                        | 2                        | 1                        | 0                        |                          |     |
| b. Walk 150<br>feet? (1/2<br>block)? | <input type="checkbox"/> | 150 |
|                                      | 4                        | 3                        | 2                        | 1                        | 0                        |                          |     |
| c. Walk 300<br>feet? (1 block)?      | <input type="checkbox"/> | 300 |
|                                      | 4                        | 3                        | 2                        | 1                        | 0                        |                          |     |
| d. Walk 600<br>feet? (2<br>blocks)?  | <input type="checkbox"/> | 600 |
|                                      | 4                        | 3                        | 2                        | 1                        | 0                        |                          |     |

|              |                          |                          |                          |                          |                          |                          |      |
|--------------|--------------------------|--------------------------|--------------------------|--------------------------|--------------------------|--------------------------|------|
| e. Walk 900  | <input type="checkbox"/> |      |
| feet? (3     |                          |                          |                          |                          |                          |                          | 900  |
| blocks)?     | 4                        | 3                        | 2                        | 1                        | 0                        |                          |      |
| f. Walk 1500 | <input type="checkbox"/> |      |
| feet? (5     |                          |                          |                          |                          |                          |                          | 1500 |
| blocks)?     | 4                        | 3                        | 2                        | 1                        | 0                        |                          |      |

---



3. Stair subscale of the WIQ

Please place a √ in the box that best describes how hard it was for you to climb stairs without stopping to rest during the last week. Please note 1 flight of stairs is roughly equal to 14 steps.

| During the last week, how difficult was it for you to: | No difficulty            | Slight difficulty        | Some difficulty          | Much difficulty          | Unable to do             | Did not do for other reasons | Weight |
|--------------------------------------------------------|--------------------------|--------------------------|--------------------------|--------------------------|--------------------------|------------------------------|--------|
| a. Climb 1 flight of stairs?                           | <input type="checkbox"/>     | 1      |
|                                                        | 4                        | 3                        | 2                        | 1                        | 0                        |                              |        |
| b. Climb 2 flights of stairs?                          | <input type="checkbox"/>     | 2      |
|                                                        | 4                        | 3                        | 2                        | 1                        | 0                        |                              |        |
| c. Climb 3 flight of stairs?                           | <input type="checkbox"/>     | 3      |
|                                                        | 4                        | 3                        | 2                        | 1                        | 0                        |                              |        |
